# Supplementary material for: Ultrasensitive Photochemical Immunosensor Based on Flowerlike SnO2/BiOI/Ag2S Composites for Detection of Procalcitonin
Source: MDPI journal article supplement (doi:10.3390/bios11110421), 2021-10-28
Supplement: s1 [file s1]

Article

# Ultrasensitive Photochemical Immunosensor Based on Flowerlike SnO<sub>2</sub>/BiOI/Ag<sub>2</sub>S Composites for Detection of Procalcitonin

Nuo Zhang <sup>1,2</sup>, Jinhui Feng <sup>2</sup>, Guanhui Zhao <sup>2</sup>, Xiaoyi Duan <sup>1</sup>, Yaoguang Wang <sup>3,\*</sup>, Daopeng Zhang <sup>1,\*</sup> and Qin Wei <sup>2</sup>

- <sup>1</sup> School of Chemistry and Chemical Engineering, Shandong University of Technology, Zibo 255049, China; [chm\\_zhangn@ujn.edu.cn](mailto:chm_zhangn@ujn.edu.cn) (N.Z.); [sennuo\\_1225@163.com](mailto:sennuo_1225@163.com) (X.D.)
  - <sup>2</sup> Key Laboratory of Interfacial Reaction & Sensing Analysis in Universities of Shandong, School of Chemistry and Chemical Engineering, University of Jinan, Jinan 250022, China; [fengjinhui2011@163.com](mailto:fengjinhui2011@163.com) (J.F.); [zhaoguanhui9001@163.com](mailto:zhaoguanhui9001@163.com) (G.Z.); [sdjndxwq@163.com](mailto:sdjndxwq@163.com) (Q.W.)
  - <sup>3</sup> Shandong Provincial Key Laboratory of Molecular Engineering, School of Chemistry and Chemical Engineering, Qilu University of Technology (Shandong Academy of Sciences), Jinan 250353, China
- \* Correspondence: [wangyaoguang@qlu.edu.cn](mailto:wangyaoguang@qlu.edu.cn) (Y.W.); [dpzhang@sdut.edu.cn](mailto:dpzhang@sdut.edu.cn) (D.Z.);  
Tel./Fax: +86-531-8276-7872

**Citation:** Zhang, N.; Feng, J.; Zhao, G.; Duan, X.; Wang, Y.; Zhang, D.; Wei, Q. Ultrasensitive Photochemical Immunosensor Based on Flowerlike SnO<sub>2</sub>/BiOI/Ag<sub>2</sub>S Composites for Detection of Procalcitonin. *Biosensors* **2021**, *11*, 421.  
<https://doi.org/10.3390/bios11110421>

Received: 7 October 2021

Accepted: 25 October 2021

Published: 28 October 2021

**Publisher's Note:** MDPI stays neutral with regard to jurisdictional claims in published maps and institutional affiliations.

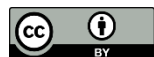

**Copyright:** © 2021 by the authors. Submitted for possible open access publication under the terms and conditions of the Creative Commons Attribution (CC BY) license (<http://creativecommons.org/licenses/by/4.0/>).

## 1. Materials and apparatus

Thioglycolic acid (TGA) was obtained from Macklin Reagent Co., Ltd. (Shanghai, China). 1-ethyl-3-(3-dimethylaminopropyl) carbodiimide hydrochloride (EDC) and N-hydroxysuccinimide (NHS) were obtained from Aladdin Reagent Database Inc. (Shanghai, China). Tin (IV) chloride pentahydrate ( $\text{SnCl}_4$ ), thioacetamide, potassium iodide (KI), Bismuth nitrate pentahydrate ( $\text{Bi}(\text{NO}_3)_3 \cdot 5\text{H}_2\text{O}$ ), sodium sulfide ( $\text{Na}_2\text{S}$ ), silver nitrate ( $\text{AgNO}_3$ ), ascorbic acid (AA), absolute ethanol, isopropyl alcohol and acetone were purchased from Sinopharm Chemical Reagent Co., Ltd. (Beijing, China). Phosphate buffered solution (PBS,  $1/15 \text{ mol} \cdot \text{L}^{-1} \text{ KH}_2\text{PO}_4$  and  $1/15 \text{ mol} \cdot \text{L}^{-1} \text{ Na}_2\text{HPO}_4$ ) containing AA was used as an electrolyte for the PEC measurements. All other chemicals in the experiment were analytical grade and were used as received without further purification.

## 2. Apparatus

Scanning electron microscope (SEM) images and energy dispersive spectroscopy (EDS) were obtained by using a field-emission SEM (Zeiss, Gemini 300, Germany). Electrochemical impedance spectroscopy (EIS) analysis was performed with an RST5200F electrochemical workstation (Zhengzhou Shiruisi Technology Co., Ltd, China) with a three-electrode system in a  $5.0 \text{ mmol} \cdot \text{L}^{-1} [\text{Fe}(\text{CN})_6]^{3-/4-}$  solution containing  $0.10 \text{ mol} \cdot \text{L}^{-1} \text{ KCl}$ . UV-vis diffuse reflectance spectrum measurements were performed with a Shimadzu UV-3101PC spectrometer (Japan). All PEC experiments were measured on a CHI760E electrochemical workstation (Chenhua Instrument Shanghai Co., Ltd, China) by using a conventional three-electrode system comprising of a saturated calomel electrode as reference electrode, a platinum wire as a counter-electrode, and the as-prepared  $\text{SnO}_2/\text{BiOI}/\text{Ag}_2\text{S}$  modified ITO electrode ( $2.5 \times 1.0 \text{ cm}^2$ ) as working electrode.

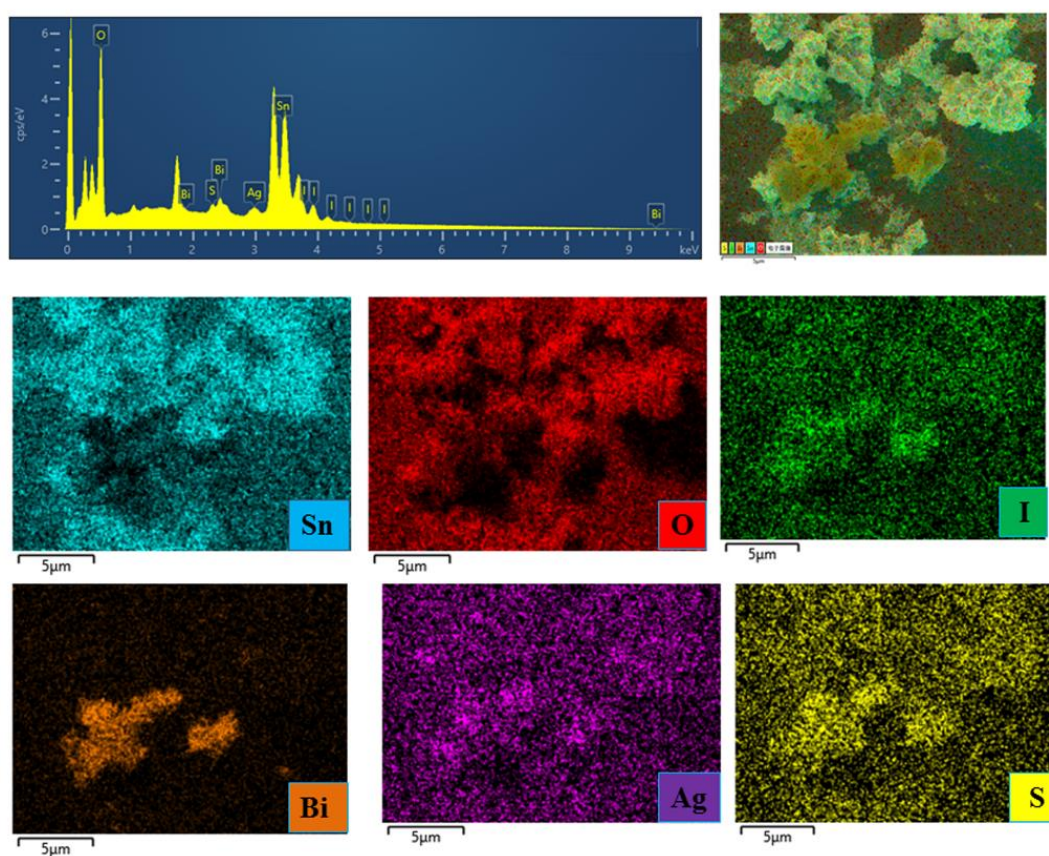

Figure S1 The EDS mapping images of SnO<sub>2</sub>/BiOI/Ag<sub>2</sub>S composites.

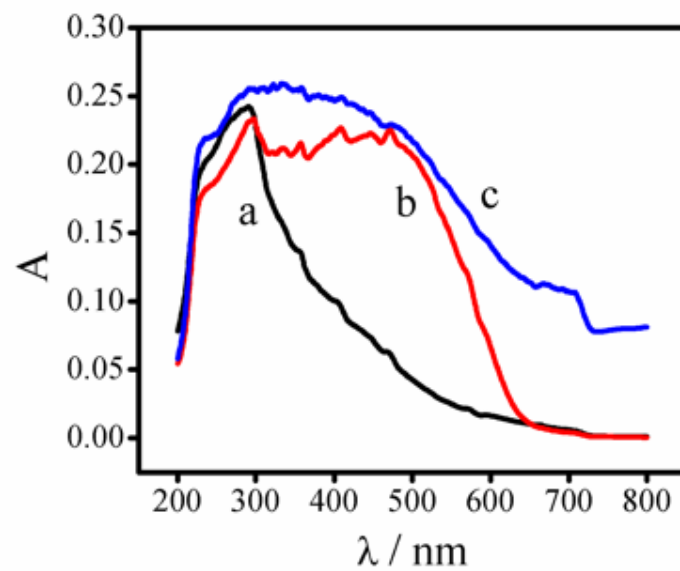

Figure S2 UV-Vis diffuse reflectance spectra of SnO<sub>2</sub> (a), SnO<sub>2</sub>/BiOI (b) and SnO<sub>2</sub>/BiOI/Ag<sub>2</sub>S (c).

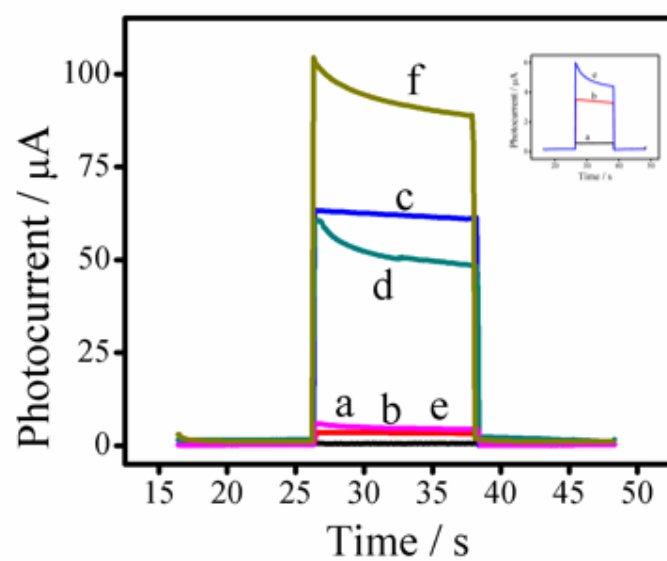

Figure S3 Time-based photocurrent response curves of  $\text{SnO}_2$ (a),  $\text{BiOI}$ (b),  $\text{SnO}_2/\text{BiOI}$ (c),  $\text{SnO}_2/\text{Ag}_2\text{S}$ (d),  $\text{BiOI}/\text{Ag}_2\text{S}$ (e) and  $\text{SnO}_2/\text{BiOI}/\text{Ag}_2\text{S}$ (f).

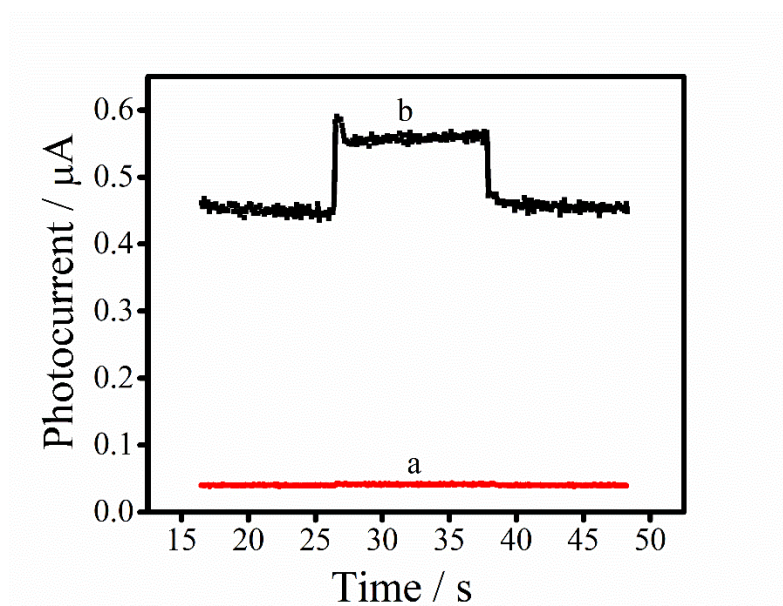

Figure S4 Time-based photocurrent response curves of ITO electrode (a) and ITO/SnO<sub>2</sub> (b)

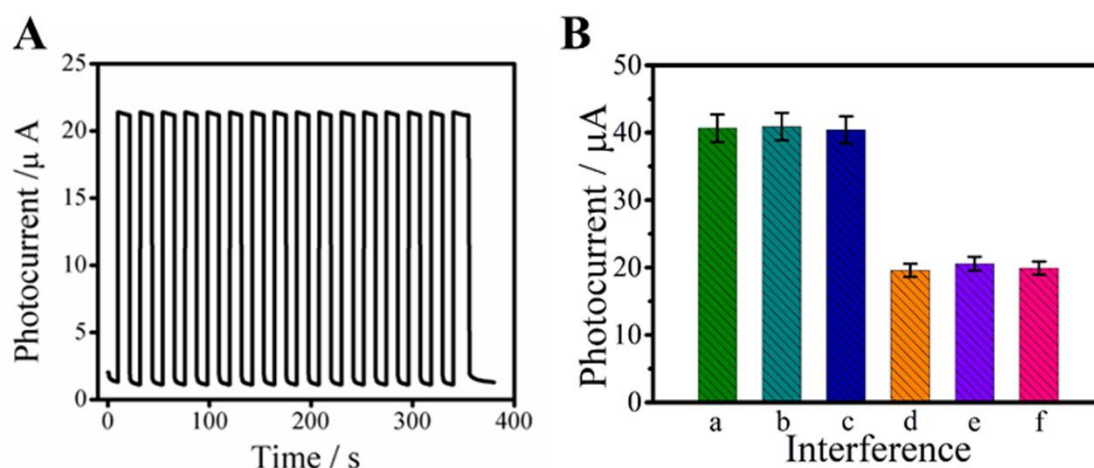

Figure 5. Stability curve of chronocurrent (A); Selectivity of the PEC immunosensor for detecting PCT (B) : (a) Blank , (b) Blank+100  $\text{ng}\cdot\text{mL}^{-1}$  CEA, (c) Blank+100  $\text{ng}\cdot\text{mL}^{-1}$  PSA, (d) 1.0  $\text{ng}\cdot\text{mL}^{-1}$  PCT, (e) 1.0  $\text{ng}\cdot\text{mL}^{-1}$  PCT+100  $\text{ng}\cdot\text{mL}^{-1}$  CEA, (g) (f) 1.0  $\text{ng}\cdot\text{mL}^{-1}$  PCT+100  $\text{ng}\cdot\text{mL}^{-1}$  PSA. The applied potential was 0 V. Error bars = SD ( $n = 5$ ).

Table S1 Comparison of the performance of the proposed PEC immunosensor for PCT detection and those of other reports.

| Detection method                              | Liner range<br>(pg·mL <sup>-1</sup> ) | Detection limit<br>(pg·mL <sup>-1</sup> ) | References |
|-----------------------------------------------|---------------------------------------|-------------------------------------------|------------|
| Chemiluminescence immunoassay                 | 44 - $1.0 \times 10^5$                | 44                                        | 1          |
| Eelectrochemical immunosensor                 | 1.0 - $5.0 \times 10^4$               | 0.36                                      | 2          |
| Ratiometric electrochemical immunosensor      | 1.0 - $1.0 \times 10^5$               | 0.30                                      | 3          |
| Immunosorbent assay                           | 1.0 - $1.0 \times 10^5$               | 0.095                                     | 4          |
| Immunochromatographic assay                   | 62.5 - $4.0 \times 10^5$              | 62.5                                      | 5          |
| SERS-based immunochromatographic assay        | 10 - $1.0 \times 10^7$                | 8.017                                     | 6          |
| Time-resolved digital immunoassay             | 4.2 - $1.25 \times 10^4$              | 2.8                                       | 7          |
| Electrochemical paper-based analytical device | 0.50 - $2.5 \times 10^5$              | 0.27                                      | 8          |
| Lateral flow immunoassay                      | 12 - $1.0 \times 10^4$                | 31                                        | 9          |
| Capillary immunosensor                        | 0.10 - $1.0 \times 10^5$              | 0.01                                      | 10         |
| Electrochemiluminescence immunosensor         | 0.10 - $1.0 \times 10^4$              | 0.0257                                    | 11         |
| Electrochemiluminescence immunosensor         | 0.10 - $1.0 \times 10^5$              | 0.01258                                   | 12         |
| Electrochemiluminescence immunosensor         | 0.010 - $1.0 \times 10^5$             | 0.00365                                   | 13         |
| Electrochemiluminescence immunosensor         | 0.005 - 100                           | 0.0021                                    | 14         |
| Electrochemiluminescence immunosensor         | 0.10 - $5.0 \times 10^4$              | 0.054                                     | 15         |
| Electrochemiluminescence immunosensor         | 0.05 - $1.0 \times 10^5$              | 0.017                                     | 16         |
| Photoelectrochemical immunosensor             | 0.10 - $5.0 \times 10^4$              | 0.020                                     | 17         |
| Photoelectrochemical immunosensor             | 0.10 - $1.0 \times 10^5$              | 0.030                                     | 18         |
| Photoelectrochemical immunosensor             | 0.50 - $1.0 \times 10^5$              | 0.17                                      | 19         |
| Photoelectrochemical immunosensor             | 1.0 - $1.0 \times 10^5$               | 0.42                                      | 20         |
| Photoelectrochemical immunosensor             | 0.50 - $1.0 \times 10^5$              | 0.14                                      | This work  |



Table S2. The results of the PCT determination in human serum samples

| Content in samples<br>(ng·mL <sup>-1</sup> ) | Added content<br>(ng·mL <sup>-1</sup> ) | Average content                           |                        |              |
|----------------------------------------------|-----------------------------------------|-------------------------------------------|------------------------|--------------|
|                                              |                                         | ( <i>n</i> =11)<br>(ng·mL <sup>-1</sup> ) | RSD ( <i>n</i> =11, %) | Recovery (%) |
| 0.0400                                       | 0.0100                                  | 0.0512                                    | 8.4                    | 103%         |
|                                              | 1.00                                    | 1.04                                      | 7.6                    | 100%         |
| 0.800                                        | 1.00                                    | 1.79                                      | 4.7                    | 98.8%        |
|                                              | 10.0                                    | 10.8                                      | 2.2                    | 100 %        |

## References:

- [1] Enqi Huang, Dezhi Huang, Yu Wang, et al. Active droplet-array microfluidics-based chemiluminescence immunoassay for point-of-care detection of procalcitonin. *Biosensors and Bioelectronics*, 2022,195, 113684.
- [2] Hui Ding, Lei Yang, Hongying Jia, et al. Label-free electrochemical immunosensor with palladium nanoparticles functionalized MoS<sub>2</sub>/NiCo heterostructures for sensitive procalcitonin detection. *Sensors and Actuators B: Chemical*, 2020, 312, 127980.
- [3] Juncong Miao, Kang Du, Xuan Li, et al. Ratiometric electrochemical immunosensor for the detection of procalcitonin based on the ratios of SiO<sub>2</sub>-Fc-COOH-Au and UiO-66-TB complexes. *Biosensors and Bioelectronics*, 2021,171, 112713.
- [4] Chang Yue Chiang, Tze Ta Huang, Chih Hui Wang, et al. Fiber optic nanogold-linked immunosorbent assay for rapid detection of procalcitonin at femtomolar concentration level. *Biosensors and Bioelectronics*, 2020, 151, 111871.
- [5] Shu Zhou, Yuanli Peng, Jing Hu, et al. Quantum dot nanobead-based immunochromatographic assay for the quantitative detection of the procalcitonin antigen in serum samples. *Microchemical Journal*, 2020, 159, 105533.
- [6] Ji Xia, Dan Lu, Yifan Liu, et al. Prediction of premature rupture of membranes via simultaneous detection of procalcitonin and interleukin-6 by a SERS-based immunochromatographic assay. *New Journal of Chemistry*, 2020, 44, 17099.
- [7] Wenwen Jing, Yan Wang, Yunze Yang, et al. Time-resolved digital immunoassay for rapid and sensitive quantitation of procalcitonin with plasmonic imaging. *ACS Nano*, 2019, 13, 8609-8617.
- [8] Suchanat Boonkaew, Ilhoon Jang, Eka Noviana, et al. Electrochemical paper-based analytical device for multiplexed, point-of-care detection of cardiovascular disease biomarkers. *Sensors and Actuators B: Chemical*, 2021, 330, 129336.
- [9] Liang Huang, Yuxing Zhang, Tao Liao, et al. Compact magneto-fluorescent colloids by hierarchical assembly of dual-components in radial channels for sensitive point-of-care immunoassay. *Small*, 2021, 17, 2100862.
- [10] Xuexue Xu, Xingda Song, Rongbin Nie, et al. Ultra-sensitive capillary immunosensor

combining porous-layer surface modification and biotin-streptavidin nano-complex signal amplification: Application for sensing of procalcitonin in serum. *Talanta*, 2019, 205, 120089.

- [11] Cui Song, Xiaojian Li, Lihua Hu, et al. Quench-Type Electrochemiluminescence Immunosensor Based on Resonance Energy Transfer from Carbon Nanotubes and Au-Nanoparticles-Enhanced g-C<sub>3</sub>N<sub>4</sub> to CuO@Polydopamine for Procalcitonin Detection. *ACS Applied Materials & Interfaces*, 2020, 12, 8006-8015.
- [12] Lihua Hu, Cui Song, Tengfei Shi, et al. Dual-quenching electrochemiluminescence resonance energy transfer system from IRMOF-3 coreaction accelerator enriched nitrogen-doped GQDs to ZnO@Au for sensitive detection of procalcitonin. *Sensors and Actuators B: Chemical*, 2021, 346, 130495.
- [13] Lu Zhao, Xianzhen Song, Xiang Ren, et al. Ultrasensitive near-infrared electrochemiluminescence biosensor derived from Eu-MOF with antenna effect and high efficiency catalysis of specific CoS<sub>2</sub> hollow triple shelled nanoboxes for procalcitonin. *Biosensors and Bioelectronics*, 2021, 191, 113409.
- [14] Xiaojian Li, Yu Du, Peng Xu, et al. Signal-off electrochemiluminescence immunosensor based on Mn-Eumelanin coordination nanoparticles quenching PtCo-CuFe<sub>2</sub>O<sub>4</sub>-reduced graphene oxide enhanced luminol. *Sensors and Actuators B: Chemical*, 2020, 323, 128702.
- [15] Lei Yang, Jingwei Xue, Yue Jia, et al. Construction of well-ordered electrochemiluminescence sensing interface using peptide-based specific antibody immobilizer and N-(aminobutyl)-N-(ethylisoluminol) functionalized ferritin as signal indicator for procalcitonin analysis. *Biosensors and Bioelectronics*, 2019, 142, 111562.
- [16] Xinrong Shao, Xianzhen Song, Xin Liu, et al. A dual signal-amplified electrochemiluminescence immunosensor based on core-shell CeO<sub>2</sub>-Au@Pt nanosphere for procalcitonin detection. *Microchimica Acta*, 2021, 188, 344.
- [17] Yanrong Qian, Jinhui Feng, Huan Wang, et al. Sandwich-type signal-off photoelectrochemical immunosensor based on dual suppression effect of PbS quantum dots/Co<sub>3</sub>O<sub>4</sub> polyhedron as signal amplification for procalcitonin detection.

Sensors and Actuators B: Chemical, 2019, 300, 127001.

- [18] Chunzhu Bao, Dawei Fan, Xin Liu, et al. A signal-off type photoelectrochemical immunosensor for the ultrasensitive detection of procalcitonin:  $\text{Ru}(\text{bpy})_3^{2+}$  and  $\text{Bi}_2\text{S}_3$  co-sensitized  $\text{ZnTiO}_3/\text{TiO}_2$  polyhedra as matrix and dual inhibition by  $\text{SiO}_2/\text{PDA-Au}$ . Biosensors and Bioelectronics, 2019, 142, 111513.
- [19] Mengdi Wang, Xuejing Liu, Hongying Jia, et al. A novel approach to photoelectrochemical immunoassay for procalcitonin on the basis of  $\text{SnS}_2/\text{CdS}$ . New Journal of Chemistry, 2020, 44, 15281.
- [20] Xin Liu, Chunzhu Bao, Xinrong Shao, et al. A procalcitonin photoelectrochemical immunosensor: NCQDs and  $\text{Sb}_2\text{S}_3$  co-sensitized hydrangea-shaped  $\text{WO}_3$  as a matrix through a layer-by-layer assembly. New Journal of Chemistry, 2020, 44, 2452.
